# Supplementary material for: Statistical Correlations between HPLC Activity-Based Profiling Results and NMR/MS Microfraction Data to Deconvolute Bioactive Compounds in Mixtures
Source: MDPI journal article supplement (doi:10.3390/molecules21030259), 2016-02-24
Supplement: s1 [file s1]

# Supplementary Materials: Statistical Correlations between HPLC Activity-Based Profiling Results and NMR/MS Microfractions Data to Deconvolute Bioactive Compounds in Mixture

Samuel Bertrand, Antonio Azzollini, Andreas Nievergelt, Julien Boccard, Serge Rudaz, Muriel Cuendet and Jean-Luc Wolfender

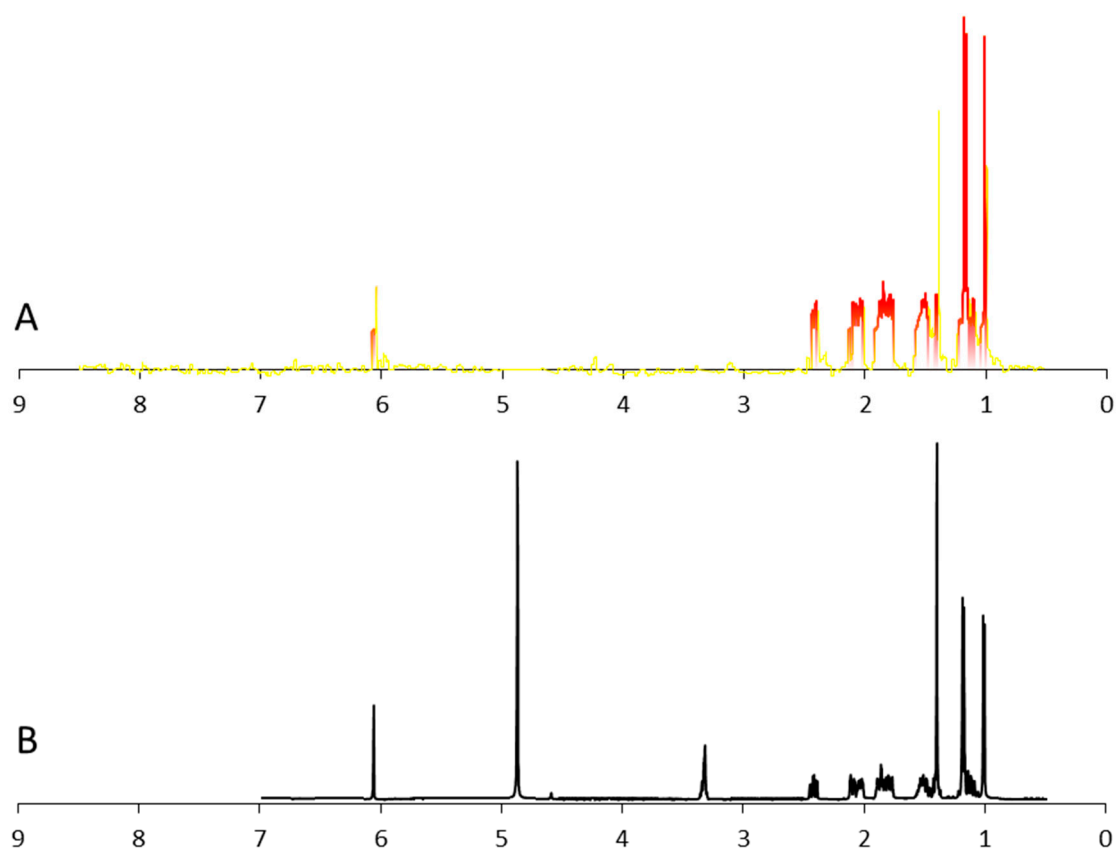

**Figure S1.** Example of statistical deconvolution on the coelution of artemisinin and 4'-bromoflavone. (A) filtered <sup>1</sup>H-NMR pseudospectrum corresponding to feature RT = 2.18 min and  $m/z = 283.1566$  (PI) – artemisinin as  $[M + H]^+$  adduct; (B) real spectrum of artemisinin in deuterated methanol.

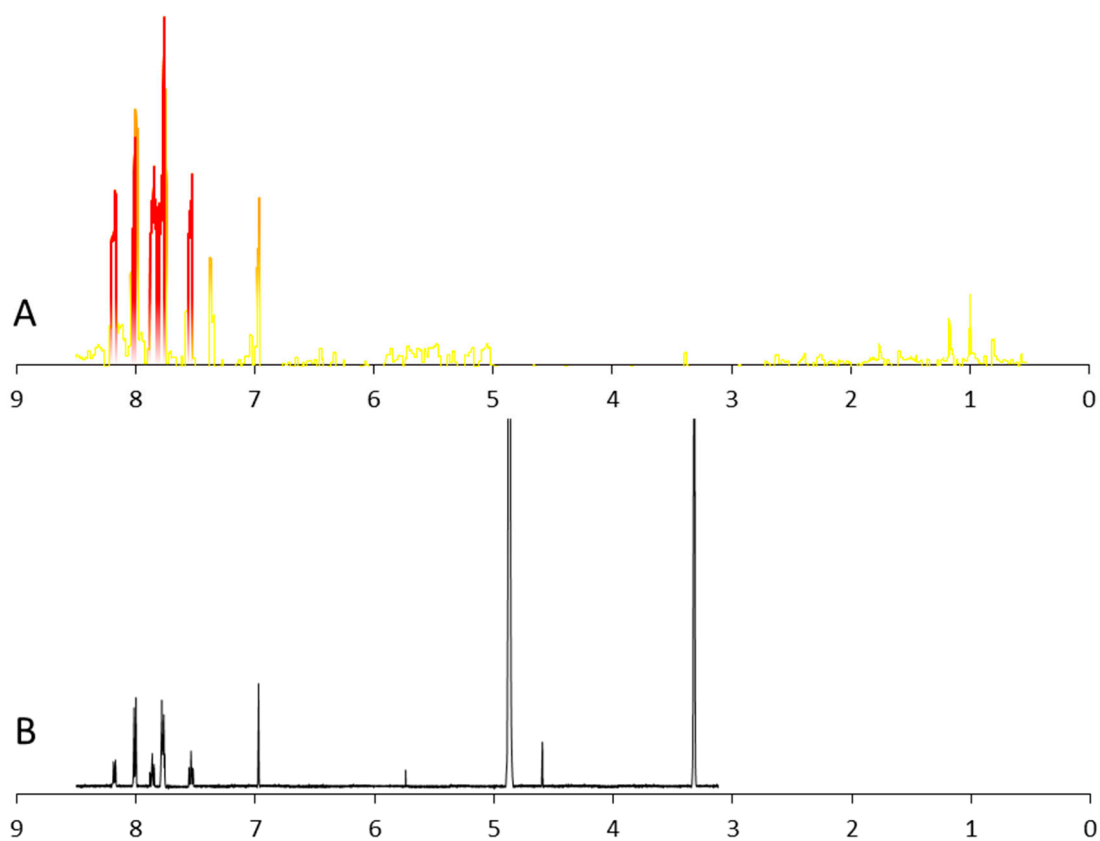

**Figure S2.** Example of statistical deconvolution on the coelution of artemisinin and 4'-bromoflavone. (A) filtered <sup>1</sup>H-NMR pseudospectrum corresponding to feature RT = 2.37 min and  $m/z = 300.9882$  (PI)–4'-bromoflavone as  $[M + H]^+$  adduct; (B) real spectrum of 4'-bromoflavone in deuterated methanol.
